# Supplementary material for: Enhanced open circuit voltage of small molecule acceptors containing angular-shaped indacenodithiophene units for P3HT-based organic solar cells
Source: Royal Society of Chemistry journal article supplement (doi:10.1039/c8tc04608e), 2018-01-01
Supplement: c8tc04608e1.pdf [file c8tc04608e1.pdf]

# Supporting information

## **Enhanced Open Circuit Voltage of Small Molecule Acceptor Containing Angular-Shaped Indacenodithiophene Unit for P3HT-based Organic Solar Cells**

Hongyan Huang<sup>a,c</sup>, Bo Xiao<sup>b,e</sup>, Chengting Huang<sup>a</sup>, Jing Zhang<sup>a</sup>, Shuli Liu<sup>a</sup>, Nina Fu<sup>a</sup>,  
Baomin Zhao<sup>a,\*</sup>, Tianshi Qin<sup>c</sup>, Erjun Zhou<sup>b,\*</sup>, Wei Huang<sup>a,c,d\*</sup>

<sup>a</sup> Key Laboratory for Organic Electronics and Information Displays & Jiangsu Key Laboratory for Biosensors, Institute of Advanced Materials (IAM), Jiangsu National Synergetic Innovation Center for Advanced Materials (SICAM), Nanjing University of Posts and Telecommunications, 9 Wenyuan Road, Nanjing 210023, China.

<sup>b</sup> CAS Key Laboratory of Nanosystem and Hierarchical Fabrication, CAS Center for Excellence in Nanoscience, National Center for Nanoscience and Technology, Beijing 100190, China

<sup>c</sup> Key Laboratory of Flexible Electronics (KLOFE) & Institute of Advanced Materials (IAM), Jiangsu National synergetic Innovation Center for Advanced Materials (SICAM), Nanjing Tech University (NanjingTech), Nanjing 211816, China.

<sup>d</sup> Shaanxi Institute of Flexible Electronics (SIFE) Northwestern Polytechnical University (NPU) Xi'an 710072, China.

<sup>e</sup> University of Chinese Academy of Sciences, Beijing 100049, P. R. China.

E-mail addresses: iambmzhao@njupt.edu.cn, zhouej@nanoctr.cn, wei-huang@njtech.edu.cn

## **Materials and instruments**

All the chemicals were purchased from J&K, Energy Chemical Inc, Sigma–Aldrich and used as received.  $^1\text{H}$  NMR and  $^{13}\text{C}$  NMR data were taken on a Bruker Ultra Shield Plus AV400 spectrometer in deuterated chloroform ( $\text{CDCl}_3$ ) solution at 298 K with tetramethylsilane (TMS;  $\delta = 0$  ppm) as an internal standard ( $^1\text{H}$  NMR: 400 MHz,  $^{13}\text{C}$  NMR: 100 MHz). Matrix assisted laser desorption/ionization time-of-flight mass spectrometry (MALDI-TOF MS) with anthracene-1,8,9-triol as matrix was carried out on a Bruker Autoflex III instrument. Thermogravimetry analysis (TGA, Rigaku TG-DTA 8120) measurements were performed on a Rigaku TG-DTA 8120 thermal analyzer at a heating rate of  $10^{-1} \text{ }^\circ\text{C min}^{-1}$  under  $\text{N}_2$  atmosphere. UV–vis absorption spectrums were collected with a Shimadzu UV–1700 spectrometer. Cyclic voltammograms (CV) experiments of the two small acceptor molecules were executed with a CHI 620C electrochemical analyzer, and a gold disc with a diameter of 2 mm, a Pt wire and an Ag/Ag<sup>+</sup> electrode were used as the working electrode, counter electrode and reference electrode, respectively. Tetrabutylammonium hexafluorophosphate ( $\text{Bu}_4\text{NPF}_6$ , 0.1 M) in dry dichloromethane was used as the supporting electrolyte. The surface morphology was obtained via tapping mode atomic force microscopy (AFM) (Veeco Dimension 3100).

## **BHJ organic solar cells fabrication and characterization**

BHJ organic solar cells with a conventional configuration of ITO/PEDOT:PSS/active layer/Ca/Al were fabricated by the following process.

Patterned indium tin oxide (ITO) glass substrates were cleaned by sequential ultrasonic treatment in detergent, deionized water, acetone, and isopropanol, and then further treated with Jelight UV-ozone cleaner for 15 min. A thin layer of poly(3,4-ethylenedioxythiophene):poly-(styrenesulfonate) (PEDOT:PSS) (~ 30 nm) was formed on ITO substrate by spin coating a PEDOT:PSS aqueous solution and baked for 150 °C for 15 min. After cooling to the room temperature, and the substrates were transferred into glove box. A blend solution of P3HT and the small molecule acceptor in chloroform was spin-coated onto the PEDOT:PSS layer. Finally, a cathode made of Ca and Al layers were then thermally evaporated on the active layer at a pressure of  $4.0 \times 10^{-6}$  mbar via a shadow mask (active area 4 mm<sup>2</sup>). The current density–voltage characteristics (J–V) of the photovoltaic cells were measured utilizing a Keithley 2400 digital source meter under a simulated AM 1.5G solar irradiation at 100 mW cm<sup>2</sup>. External Quantum Efficiency (EQE) of solar cells were measured using an Oriel Newport system (Model 66902).

## Synthesis

**Compound (2)** In a two-necked RBF (100 mL), Compound 1 (7.60 g, 20 mmol) and 2-thiophenylboric acid (5.60 g, 44 mmol) were dissolved in THF (55 mL), 2M K<sub>2</sub>CO<sub>3</sub> solution (25 mL) was added. The mixture was degassed with N<sub>2</sub> flow for 20 min, Pd(PPh<sub>3</sub>)<sub>4</sub> (70 mg, 0.60 mmol) was added under N<sub>2</sub> flow. The mixture was stirred at 70 °C under N<sub>2</sub> in dark for 24 h. The mixture was then allowed to cool to room temperature and extracted with CH<sub>2</sub>Cl<sub>2</sub> and dried with Na<sub>2</sub>SO<sub>4</sub>. The

product was purified by silica chromatography with petroleum ether/dichloromethane as the eluent, affording the product as a light yellow solid (5.6 g, 73% yield).  $^1\text{H}$  NMR (400 MHz,  $\text{CDCl}_3$ )  $\delta$  7.82 (s, 2H), 7.39 (dd,  $J = 4.9, 1.4$  Hz, 2H), 7.09 (dd,  $J = 5.2, 3.2$  Hz, 4H), 4.22 (q,  $J = 7.1$  Hz, 4H), 1.15 (t,  $J = 7.1$  Hz, 6H).  $^{13}\text{C}$  NMR (100 MHz,  $\text{CDCl}_3$ )  $\delta$  167.71, 140.49, 134.08, 133.45, 131.99, 127.39, 127.06, 126.49, 61.67, 13.79.

**1-IDT** In a RBF (100 mL), Compound 2 (3.86 g, 10mmol) was dissolved in THF (25 mL). To the solution, p-(octyloxy)phenyl Grignard reagent [obtained by adding a solution of 1-octyl bromide (18.5 g, 65 mmol) in dry THF (20 mL) to a suspension of Mg (1.87 g, 78 mmol) in dry THF (30 mL)] was added dropwisely under  $\text{N}_2$ . After the addition finished, The mixture was refluxed overnight at 70  $^\circ\text{C}$ . The mixture was poured into ice-water and extracted with ethyl acetate (100 mL). The combined organic fractions were washed with brine, water and dried over  $\text{Na}_2\text{SO}_4$ . The solvents were removed with reduced vaccum. the crude product was dissolved in acetic acid (125 mL) and then 6 mL of  $\text{H}_2\text{SO}_4$  was added. The mixture was refluxed for 5 h allowed to cool to room temperature. The combined organic fractions were washed with brine, water and dried over  $\text{Na}_2\text{SO}_4$ . The solvents were removed with reduced vacuum. The yellow residue was purified by column chromatography over silica gel (petroleum ether as the eluent) to give compound 3 as a yellow solid (3.96 g, 37% yield).  $^1\text{H}$  NMR (400 MHz,  $\text{CDCl}_3$ )  $\delta$  7.44 (s, 2H), 7.34 (d,  $J = 5.0$  Hz, 2H), 7.18 (d,  $J = 8.8$  Hz, 8H), 7.13 (d,  $J = 5.0$  Hz, 2H), 6.77 (d,  $J = 8.9$  Hz, 8H), 3.90 (t,  $J = 6.5$  Hz, 8H), 1.81

– 1.70 (m, 8H), 1.42 – 1.27 (m, 40H), 0.88 (t, J = 6.8 Hz, 12H). <sup>13</sup>C NMR (100 MHz, CDCl<sub>3</sub>) δ 158.00, 156.19, 153.76, 141.04, 136.73, 135.02, 128.95, 127.57, 123.04, 117.14, 114.05, 68.00, 61.91, 31.76, 29.37, 29.32, 29.25, 26.09, 22.66, 14.11.

**l-IDTSn** In a 50 mL Schlenk flask, l-IDT (1.0 g, 1 mmol) was dissolved in THF (20 mL) at -78 °C under N<sub>2</sub> atmosphere, and then 1.6 M n-BuLi (1.3 mL, 2 mmol) was added dropwise. The mixture solution was stirred at -40 °C for 2 h, trimethyltin chloride (1 M, 2.2 mL) was quickly injected into the solution. After stirring at -78 °C for 30 min, the solution was stirred overnight at room temperature, poured into ice-water and extracted with petroleum ether. The organic layer was washed with ammonium chloride solution, water and dried over Na<sub>2</sub>SO<sub>4</sub>. The crude product l-IDT-Sn as the yellow solid was obtained by rotary evaporation and directly used for the next step without any treatment.

**l-IDTBT** In a 50 mL Schlenk flask, 7-bromo-benzo[c][1,2,5]thiadiazole-4-carbaldehyde (486 mg, 2 mmol) and l-IDT-Sn (486 mg, 2 mmol) were dissolved in toluene (25 mL) under N<sub>2</sub> atmosphere, the solution was flushed with N<sub>2</sub> for 10 min and then Pd(PPh<sub>3</sub>)<sub>4</sub> (35 mg, 0.30 mmol) was added. After flushing with N<sub>2</sub> for 10 min, the reaction solution was heated to 100 °C for 24 h in dark and cooled to the room temperature, and extracted with dichloromethane. The crude product was obtained by rotary evaporation and purified by silica gel column chromatography with petroleum ether/dichloromethane as an eluent, affording the product l-IDT-BT as the red solid with a yield of 56%. <sup>1</sup>H NMR (400 MHz,

CDCl<sub>3</sub>) δ 10.69 (s, 2H), 8.22 – 8.19 (m, 4H), 7.99 (d, J = 7.6 Hz, 2H), 7.55 (s, 4H), 7.27 (s, 2H), 7.25 (d, J = 2.1 Hz, 4H), 6.84 (d, J = 8.9 Hz, 8H), 3.91 (t, J = 6.5 Hz, 8H), 1.78 – 1.71 (m, 8H), 1.44 – 1.25 (m, 40H), 0.88 – 0.84 (t, J = 7.0 Hz, 12H). <sup>13</sup>C NMR (100 MHz, CDCl<sub>3</sub>) δ 188.46, 158.30, 157.91, 154.70, 153.82, 152.13, 146.03, 141.55, 135.91, 135.68, 133.64, 132.77, 129.04, 125.78, 125.12, 123.06, 118.09, 114.43, 68.00, 62.48, 31.81, 29.35, 29.29, 29.23, 26.08, 22.65, 14.10.

**l-IDTBTRh** In a 50 mL Schlenk flask, IDT-BT (422 mg, 0.3 mmol) and 3-ethylrhodanine (113 mg, 0.7 mmol) were dissolved in dry CHCl<sub>3</sub> (20 mL) under N<sub>2</sub> atmosphere, two drops of piperidine were added. The mixture solution was stirred for 24 h at the room temperature and extracted with dichloromethane. The organic layer was dried over Na<sub>2</sub>SO<sub>4</sub> and concentrated on a rotary evaporator to give the crude product. Further purification was carried out by silica gel column chromatography with petroleum ether/dichloromethane as an eluent to obtain the target compound l-IDTBTRh. (422 mg, 83%). <sup>1</sup>H NMR (400 MHz, CDCl<sub>3</sub>) δ 8.49 (s, 2H), 8.17 (s, 2H), 7.94 (d, J = 7.8 Hz, 2H), 7.68 (d, J = 7.9 Hz, 2H), 7.53 (s, 2H), 7.27 (s, 4H), 7.25 (s, 4H), 6.84 (d, J = 8.9 Hz, 8H), 4.26 – 4.21 (dd, J = 12.2, 9.0 Hz, 4H), 3.93 (t, J = 6.5 Hz, 8H), 1.78 – 1.72 (m, 8H), 1.44 – 1.25(m, 40H), 0.88 – 0.84 (m, 18H). <sup>13</sup>C NMR (100 MHz, CDCl<sub>3</sub>) δ 192.91, 167.50, 158.28, 157.90, 154.63, 154.45, 151.59, 145.17, 141.92, 136.04, 135.67, 131.15, 130.01, 129.07, 127.04, 125.01, 124.77, 124.57, 124.04, 117.98, 114.42, 68.00,

62.47, 39.92, 31.82, 29.36, 29.30, 29.24, 26.09, 22.66, 14.11, 12.33. MALDI-TOF-MS (m/z) 1692.03 for [M]<sup>+</sup>.

**Compound 3, a-IDT, a-IDTSn, a-IDTBT and a-IDTBTRh:** According to the similar procedure of compound 3, a-IDT, a-IDTSn, a-IDTBT and a-IDTBTRh were synthesized, respectively.

**Compound 3** <sup>1</sup>H NMR (400 MHz, CDCl<sub>3</sub>) δ 7.80 (s, 2H), 7.36 (dd, J = 4.9, 3.0 Hz, 2H), 7.31 (dd, J = 2.9, 1.3 Hz, 2H), 7.13 (dd, J = 4.9, 1.3 Hz, 2H), 4.19 (q, J = 7.1 Hz, 4H), 1.13 (t, J = 7.1 Hz, 6H). <sup>13</sup>C NMR (100 MHz, CDCl<sub>3</sub>) δ 167.98, 140.18, 135.47, 133.59, 131.51, 128.41, 125.32, 122.87, 61.40, 13.83.

**a-IDT** <sup>1</sup>H NMR (400 MHz, CDCl<sub>3</sub>) δ 7.39 (s, 2H), 7.24 (d, J = 4.8 Hz, 2H), 7.15 (d, J = 8.8 Hz, 8H), 6.97 (d, J = 4.9 Hz, 2H), 6.76 (d, J = 8.8 Hz, 8H), 3.90 (t, J = 6.5 Hz, 8H), 1.81 – 1.68 (m, 8H), 1.48 – 1.23 (m, 40H), 0.88 (t, J = 6.8 Hz, 12H). <sup>13</sup>C NMR (100 MHz, CDCl<sub>3</sub>) δ 157.98, 156.18, 153.76, 141.03, 136.72, 135.00, 128.89, 127.47, 122.92, 117.10, 114.23, 67.97, 61.73, 31.81, 29.35, 29.30, 29.23, 26.07, 22.65, 14.09.

**a-IDTBT** <sup>1</sup>H NMR (400 MHz, CDCl<sub>3</sub>) δ 10.71 (s, 2H), 8.48 (s, 1H), 8.21 (d, J = 7.6 Hz, 2H), 7.96 (d, J = 7.5 Hz, 2H), 7.63 (s, 2H), 7.28 (s, 8H), 6.84 (d, J = 8.9 Hz, 8H), 3.93 (t, J = 6.5 Hz, 8H), 1.78 – 1.71 (m, 8H), 1.44 – 1.25 (m, 40H), 0.88 – 0.84 (m, 12H). <sup>13</sup>C NMR (100 MHz, CDCl<sub>3</sub>) δ 188.49, 159.28, 158.35, 154.06, 153.80, 152.15, 145.87, 143.36, 136.56, 135.03, 133.56, 132.68, 129.08, 125.43, 123.46, 121.80, 118.30, 114.46, 68.01, 63.71, 31.82, 29.36, 29.29, 29.24, 26.08, 22.66, 14.11.

**a-IDTBTRh**  $^1\text{H}$  NMR (400 MHz,  $\text{CDCl}_3$ )  $\delta$  8.49 (s, 2H), 8.39 (s, 2H), 7.90 (d,  $J = 7.7$  Hz, 2H), 7.66 (m, 4H), 7.28 (s, 6H), 6.83 (d,  $J = 9.0$  Hz, 10H), 4.26 – 4.21 (dd,  $J = 7.0$  Hz, 4H), 3.90 (t,  $J = 6.4$  Hz, 8H), 1.77 – 1.71 (m, 8H), 1.42 – 1.25 (m, 40H), 0.88 – 0.84 (m, 18H).  $^{13}\text{C}$  NMR (100 MHz,  $\text{CDCl}_3$ )  $\delta$  192.92, 167.46, 158.49, 158.31, 154.41, 154.10, 151.62, 145.74, 143.66, 136.65, 135.05, 131.06, 129.91, 129.06, 126.98, 124.96, 124.86, 124.44, 120.76, 118.28, 114.42, 67.99, 63.68, 39.93, 31.83, 29.37, 29.29, 29.26, 26.08, 22.67, 14.13, 12.33. MALDI-TOF-MS ( $m/z$ ) 1692.04 for  $[\text{M}]^+$ .

### TGA plots

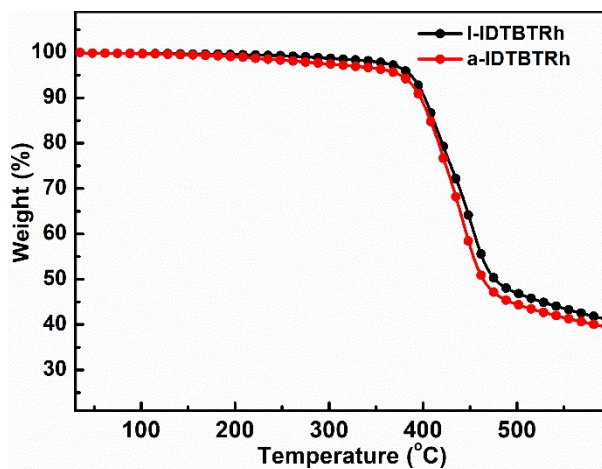

**Figure S1.** TGA plots of l-IDTBTRh and a-IDTBTRh at a heating rate of  $10\text{ }^\circ\text{C min}^{-1}$  under nitrogen atmosphere.



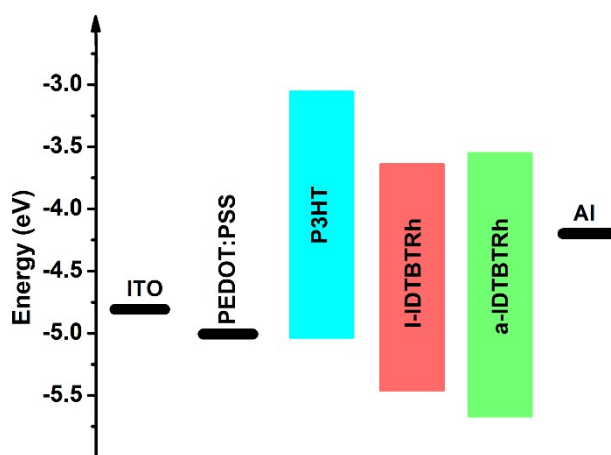

**Figure S2.** Energy level diagram of the device with a conventional non-fullerene sequential layer of ITO/PEDOT:PSS/P3HT:small molecule acceptors/Ca/Al.

### Devices optimization

**Table S1.** Device performance of the organic solar cells based on P3HT:I-IDTBTRh (w/w, 1:0.8) and P3HT:a-IDTBTRh (w/w, 0.8:1) under the thermal annealing at 100 °C for 10 min.

| Blend                 | Solvent       | $J_{sc}$<br>(mA/cm <sup>2</sup> ) | $V_{oc}$<br>(V) | FF<br>(%)   | PCE<br>(%)  |
|-----------------------|---------------|-----------------------------------|-----------------|-------------|-------------|
| <b>P3HT:I-IDTBTRh</b> | <b>CF</b>     | <b>8.04</b>                       | <b>0.85</b>     | <b>59.0</b> | <b>4.03</b> |
|                       | CB            | 9.42                              | 0.82            | 51.0        | 3.94        |
|                       | <i>o</i> -DCB | 5.62                              | 0.84            | 68.0        | 3.21        |
| <b>P3HT:a-IDTBTRh</b> | <b>CF</b>     | <b>5.11</b>                       | <b>0.91</b>     | <b>45.0</b> | <b>2.09</b> |
|                       | CB            | 3.52                              | 0.90            | 42.0        | 1.33        |
|                       | <i>o</i> -DCB | 3.50                              | 0.82            | 53.0        | 1.52        |

**Table S2.** Device performance of the PSCs based on P3HT:acceptors with different D/A ratio (from 0.5:1 to 1:0.5) under the thermal annealing at 100 °C for 10 min.

| Blend                 | D/A<br>(w/w) | $J_{sc}$<br>(mA/cm <sup>2</sup> ) | $V_{oc}$<br>(V) | FF<br>(%)   | PCE<br>(%)  |
|-----------------------|--------------|-----------------------------------|-----------------|-------------|-------------|
| <b>P3HT:I-IDTBTRh</b> | 0.5:1        | 7.03                              | 0.81            | 49.0        | 2.79        |
|                       | 0.6:1        | 9.21                              | 0.83            | 61.0        | 4.66        |
|                       | 0.8:1        | 8.37                              | 0.83            | 60.0        | 4.17        |
|                       | 1:1          | 9.10                              | 0.83            | 60.0        | 4.53        |
|                       | <b>1:0.8</b> | <b>9.45</b>                       | <b>0.84</b>     | <b>63.0</b> | <b>5.00</b> |
|                       | 1:0.6        | 8.91                              | 0.85            | 65.0        | 4.92        |
|                       | 1:0.5        | 8.85                              | 0.84            | 55.0        | 4.09        |
| <b>P3HT:a-IDTBTRh</b> | 0.5:1        | 5.26                              | 0.91            | 47.0        | 2.25        |
|                       | 0.6:1        | 5.13                              | 0.91            | 45.0        | 2.10        |
|                       | <b>0.8:1</b> | <b>5.43</b>                       | <b>0.91</b>     | <b>48.0</b> | <b>2.37</b> |

|       |      |      |      |      |
|-------|------|------|------|------|
| 1:1   | 4.70 | 0.92 | 40.0 | 1.73 |
| 1:0.8 | 4.89 | 0.91 | 40.0 | 1.78 |

**Table S3.** Device performance of the organic solar cells based on P3HT:l-IDTBTRh (w/w, 1:0.8) and P3HT:a-IDTBTRh (w/w, 0.8:1) with different thermal annealing temperature (from 110 to 150 °C).

| Blend                 | Annealing Temp.(°C) | $J_{sc}$ (mA/cm <sup>2</sup> ) | $V_{oc}$ (V) | FF (%)      | PCE (%)     |
|-----------------------|---------------------|--------------------------------|--------------|-------------|-------------|
| <b>P3HT:l-IDTBTRh</b> | 110                 | 8.55                           | 0.84         | 68.0        | 4.88        |
|                       | 120                 | 7.98                           | 0.85         | 69.0        | 4.68        |
|                       | 130                 | 8.44                           | 0.85         | 69.0        | 4.95        |
|                       | <b>140</b>          | <b>8.81</b>                    | <b>0.86</b>  | <b>71.0</b> | <b>5.38</b> |
|                       | 150                 | 8.37                           | 0.86         | 71.0        | 5.11        |
| <b>P3HT:a-IDTBTRh</b> | 110                 | 5.23                           | 0.91         | 49.0        | 2.33        |
|                       | <b>120</b>          | <b>5.00</b>                    | <b>0.92</b>  | <b>55.0</b> | <b>2.53</b> |
|                       | 130                 | 4.61                           | 0.91         | 51.0        | 2.14        |
|                       | 140                 | 5.15                           | 0.92         | 53.0        | 2.51        |
|                       | 150                 | 4.89                           | 0.92         | 56.0        | 2.52        |

**Table S4.** Device performance of the organic solar cells based on P3HT:l-IDTBTRh (w/w, 1:0.8) and P3HT:a-IDTBTRh (w/w, 0.8:1) with different solvent additives.

| Blend                 | additive    | $J_{sc}$ (mA/cm <sup>2</sup> ) | $V_{oc}$ (V) | FF (%)      | PCE (%)     |
|-----------------------|-------------|--------------------------------|--------------|-------------|-------------|
| <b>P3HT:l-IDTBTRh</b> | <b>none</b> | <b>8.81</b>                    | <b>0.86</b>  | <b>71.0</b> | <b>5.38</b> |
|                       | 1%DIO       | 7.81                           | 0.84         | 66.0        | 4.33        |
|                       | 1%CN        | 8.56                           | 0.85         | 70.0        | 5.09        |
|                       | 1%DPE       | 8.00                           | 0.83         | 64.0        | 4.25        |
| <b>P3HT:a-IDTBTRh</b> | <b>none</b> | <b>5.00</b>                    | <b>0.92</b>  | <b>55.0</b> | <b>2.53</b> |
|                       | 1%DIO       | 5.12                           | 0.91         | 58.0        | 2.70        |
|                       | 1%CN        | 4.65                           | 0.92         | 55.0        | 2.35        |
|                       | 1%DPE       | 4.65                           | 0.91         | 52.0        | 2.20        |

# NMR Spectrum

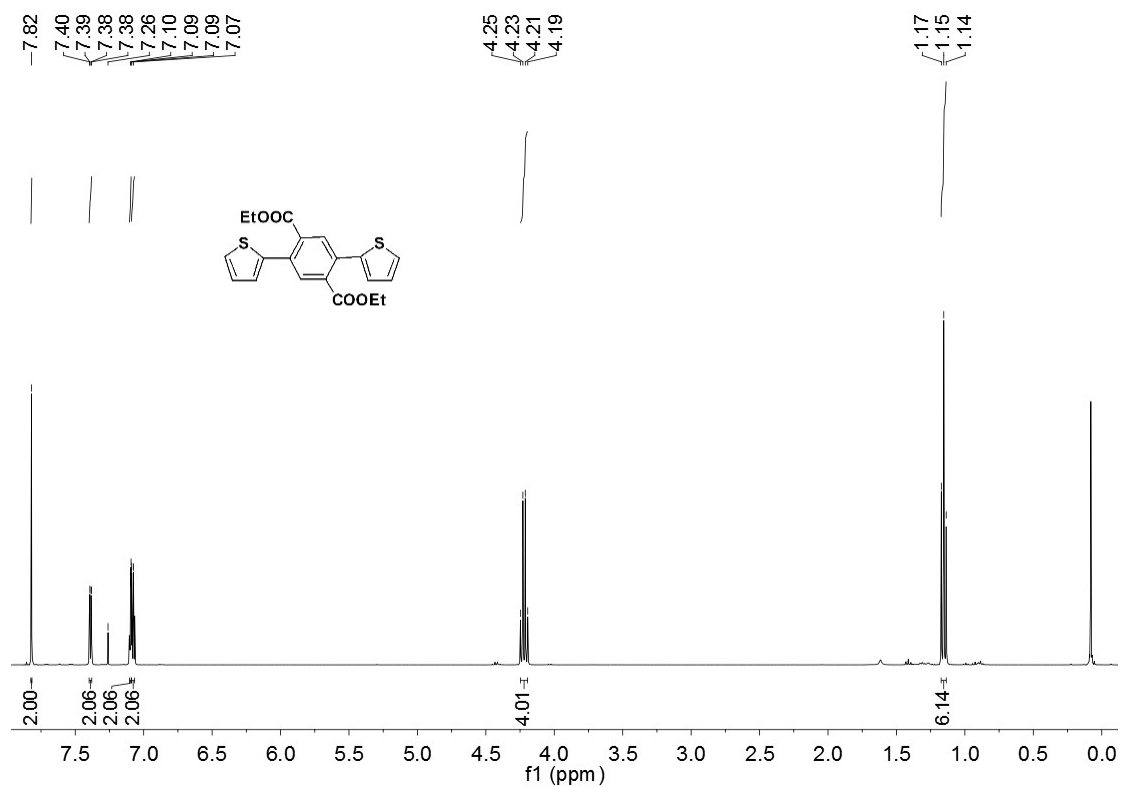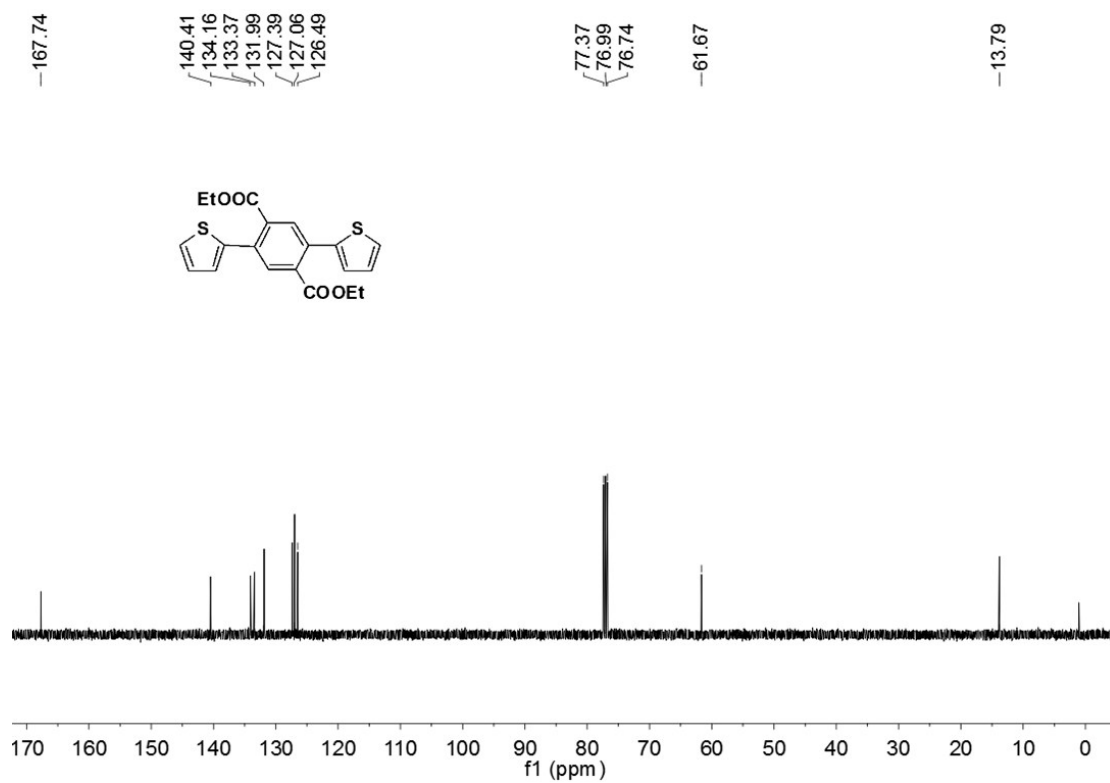

**Figure S3.** <sup>1</sup>H and <sup>13</sup>C NMR spectra of compound **2** in CDCl<sub>3</sub>.

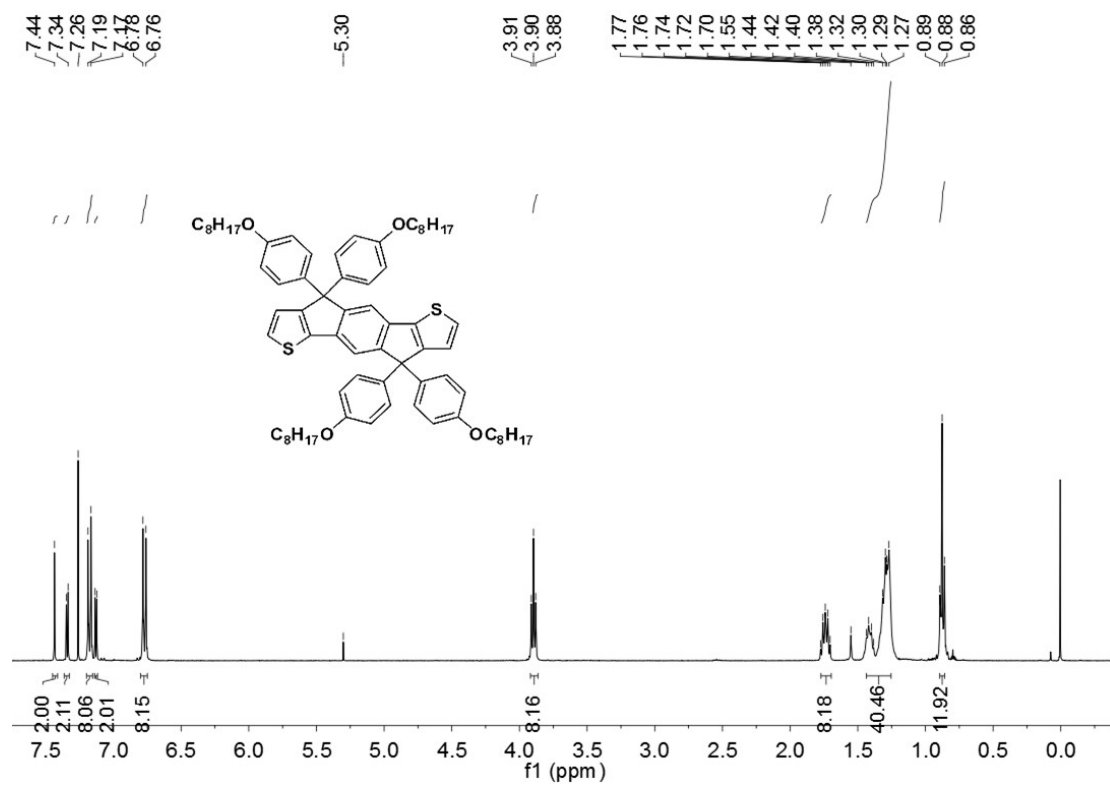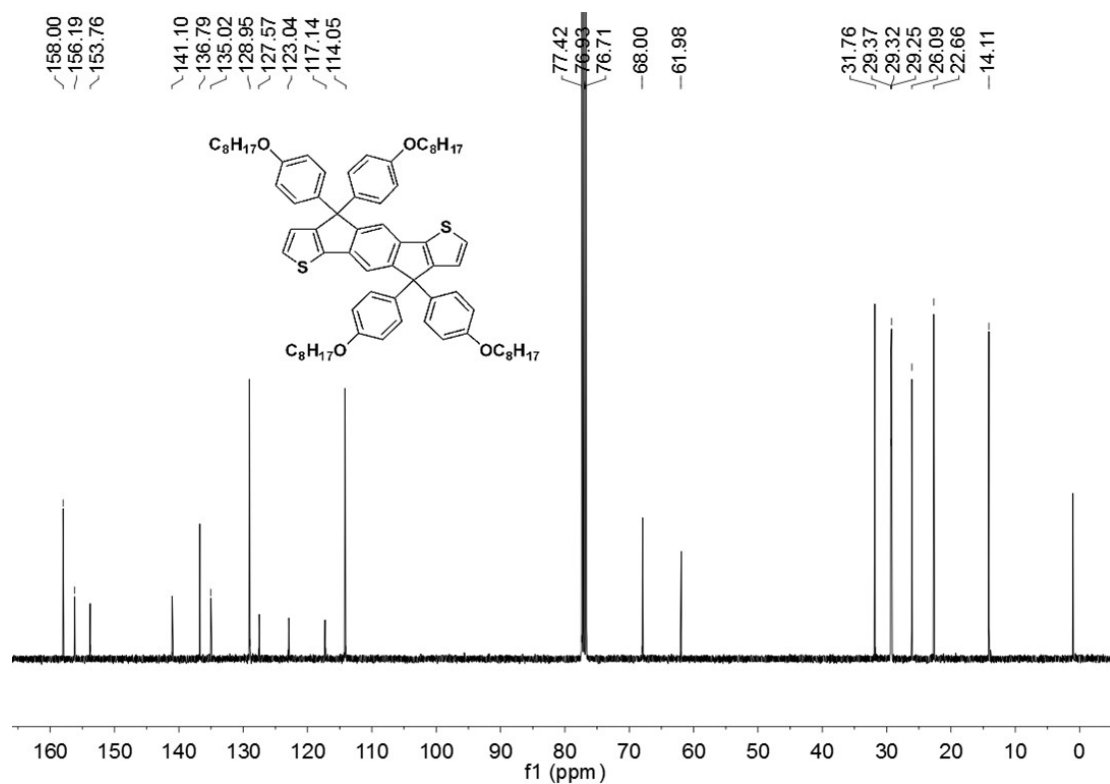

**Figure S4.** <sup>1</sup>H and <sup>13</sup>C NMR spectra of monomer **1-IDT** in CDCl<sub>3</sub>.

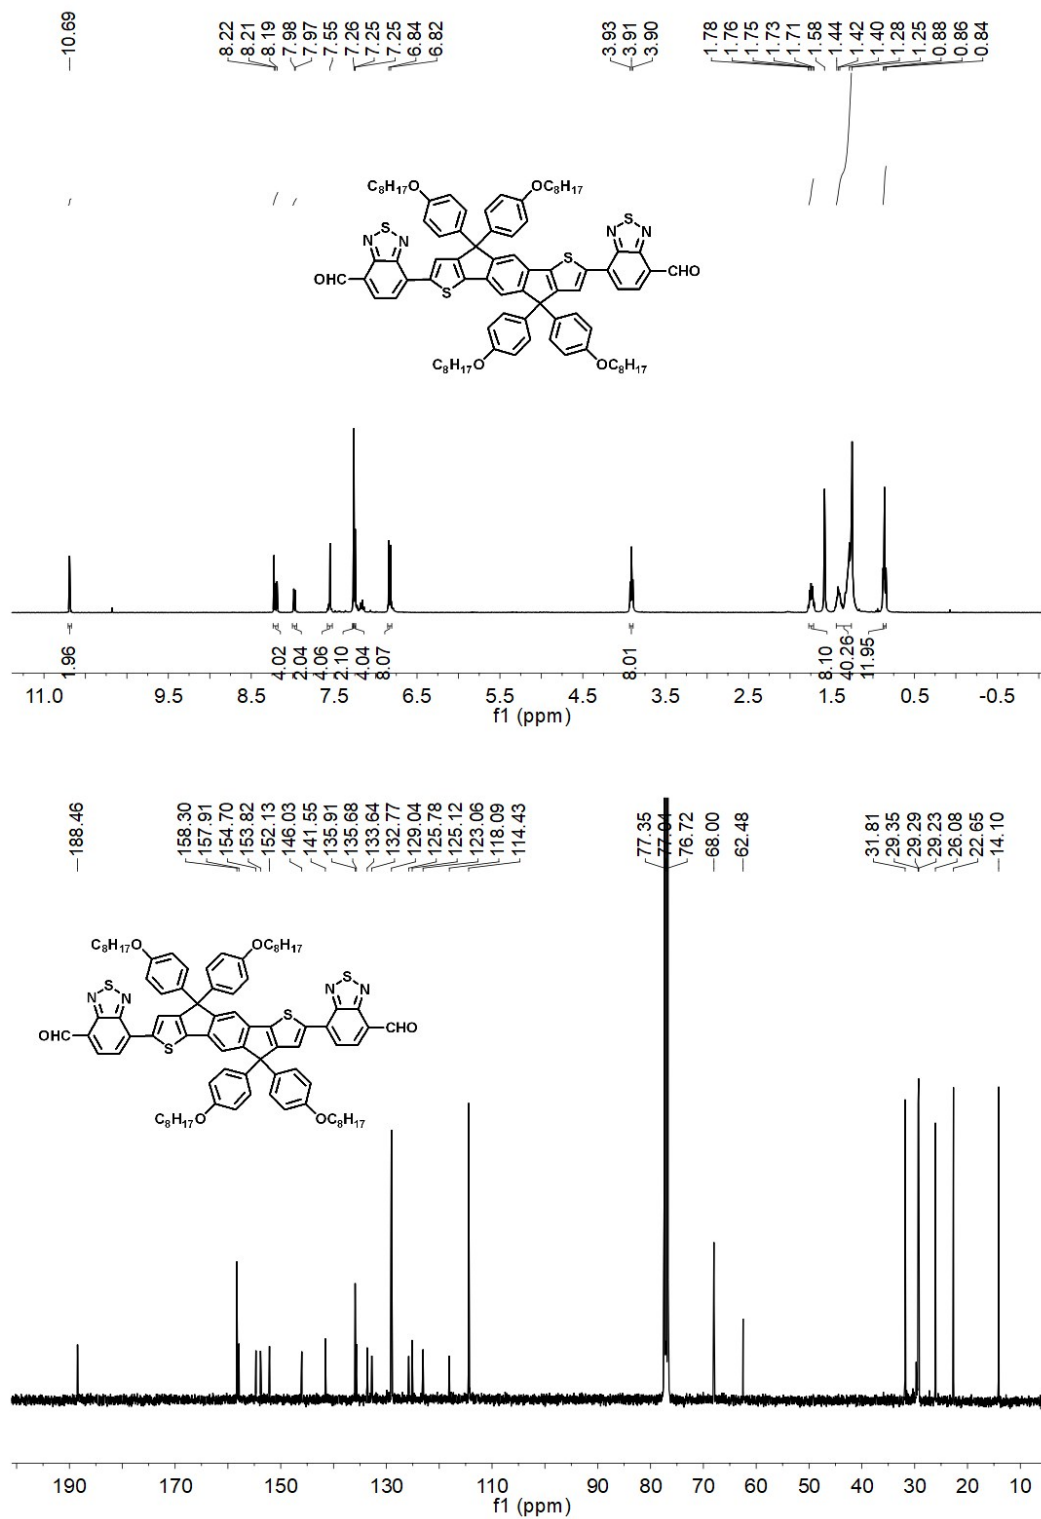

**Figure S5.** <sup>1</sup>H and <sup>13</sup>C NMR spectra of compound I-IDTBT in CDCl<sub>3</sub>.



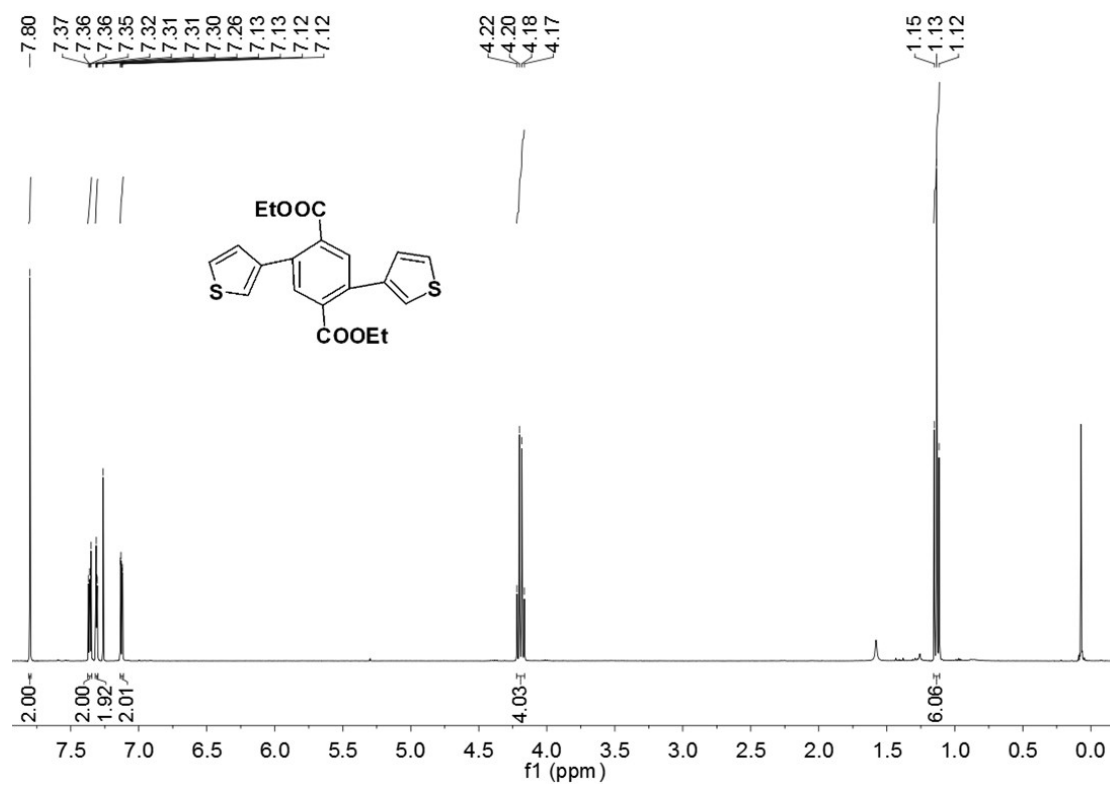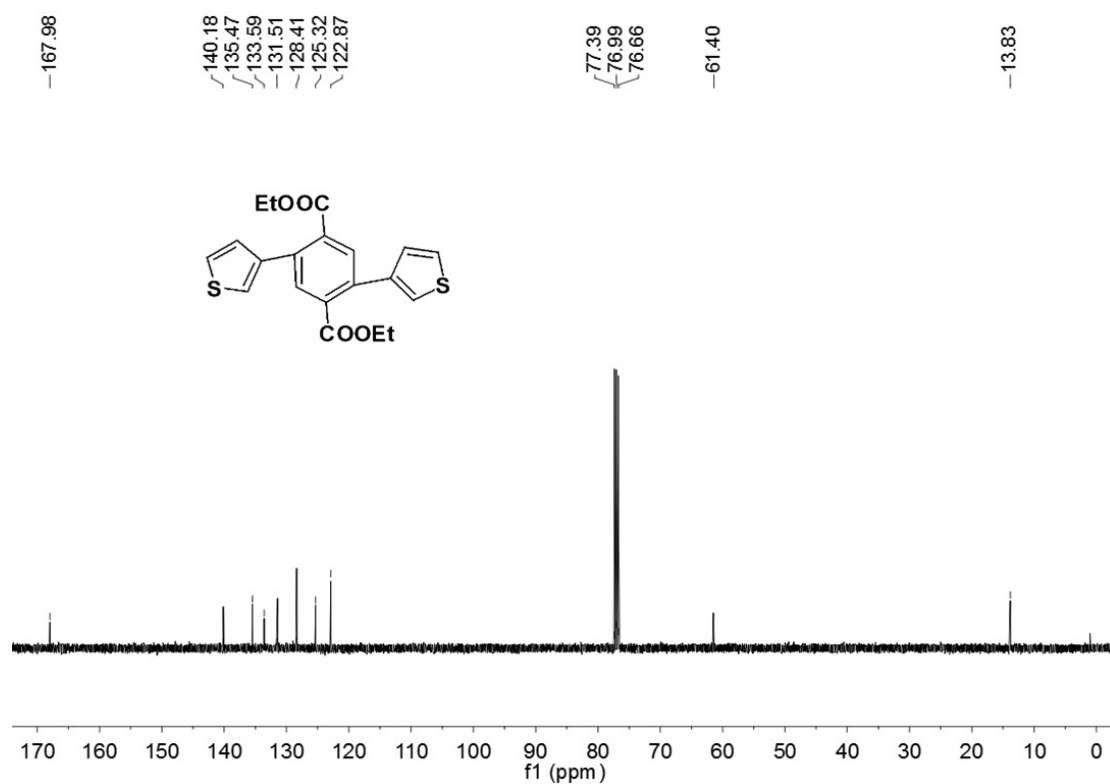

**Figure S7.** <sup>1</sup>H and <sup>13</sup>C NMR spectra of compound **3** in CDCl<sub>3</sub>.

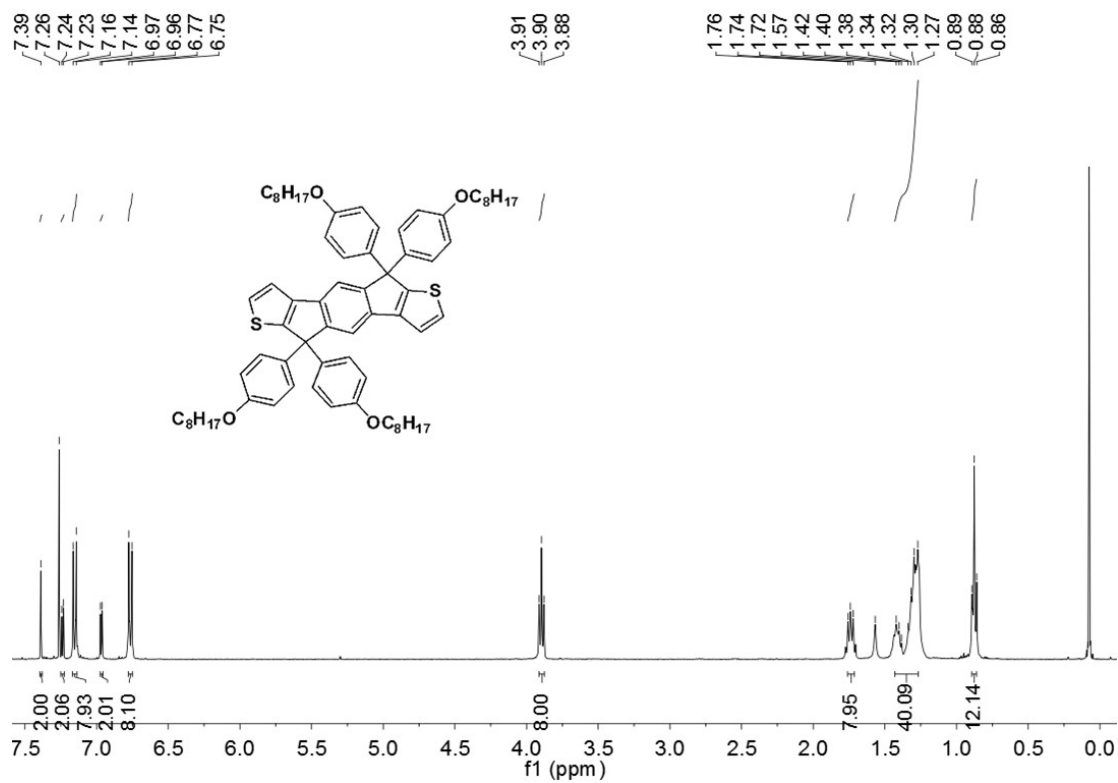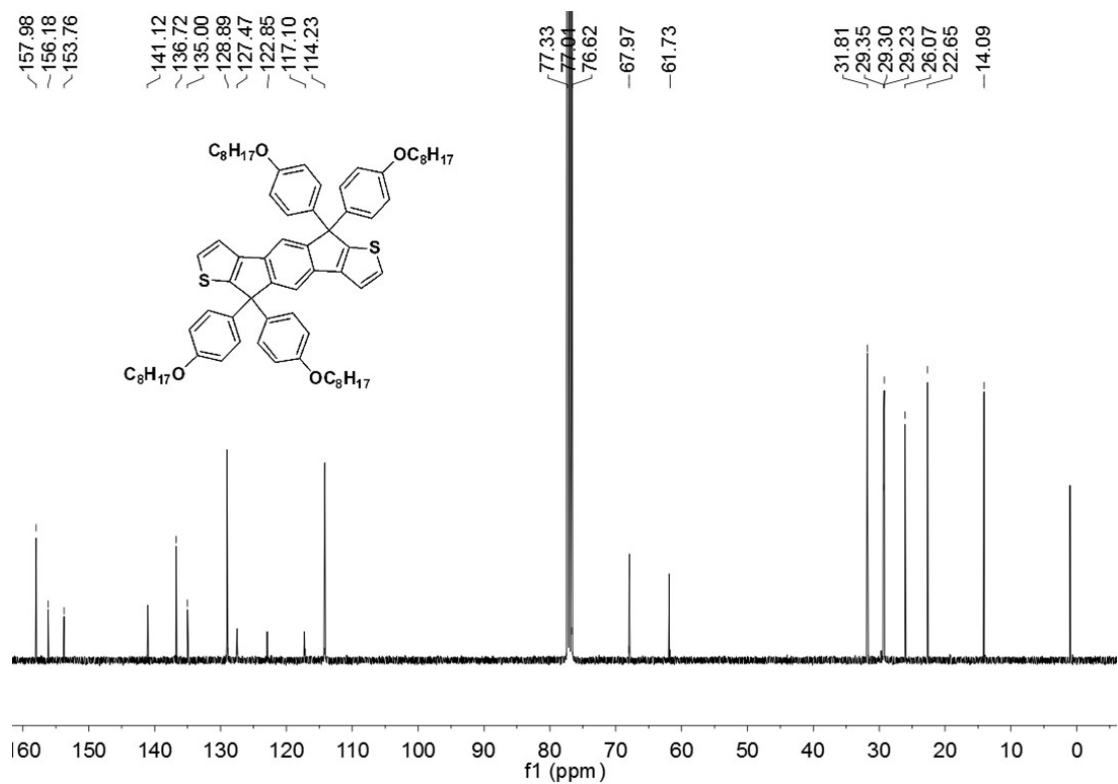

**Figure S8.** <sup>1</sup>H and <sup>13</sup>C NMR spectra of monomer a-IDT in CDCl<sub>3</sub>.



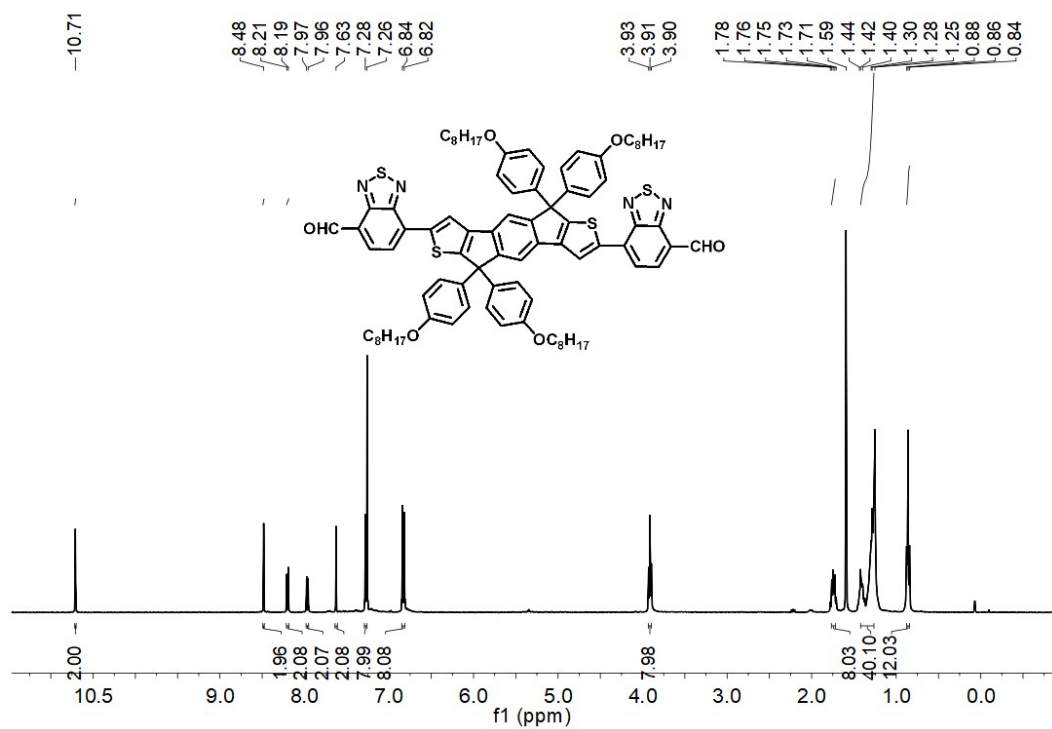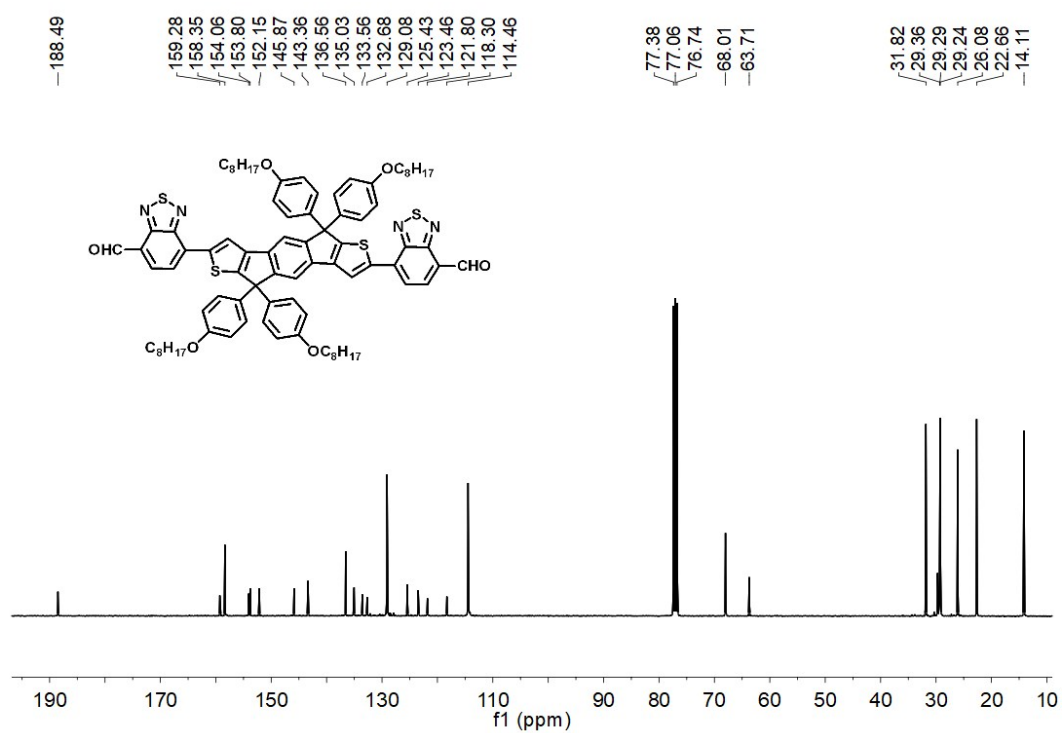

**Figure S9.**  $^1H$  and  $^{13}C$  NMR spectra of compound **a-IDTBT** in CDCl<sub>3</sub>.

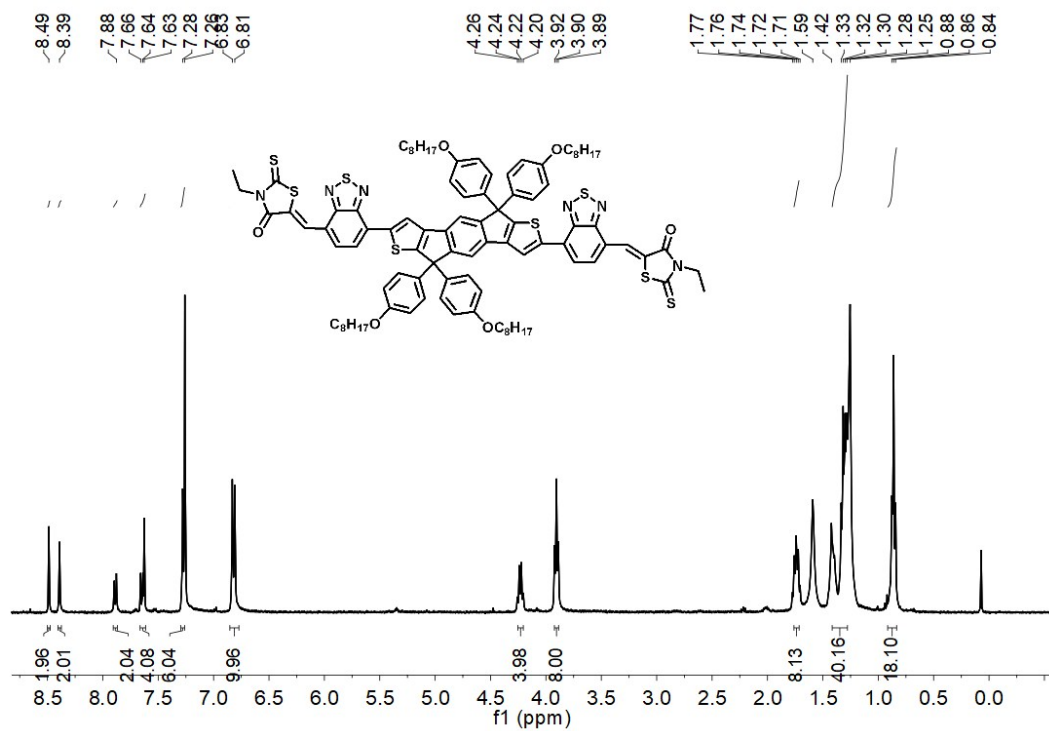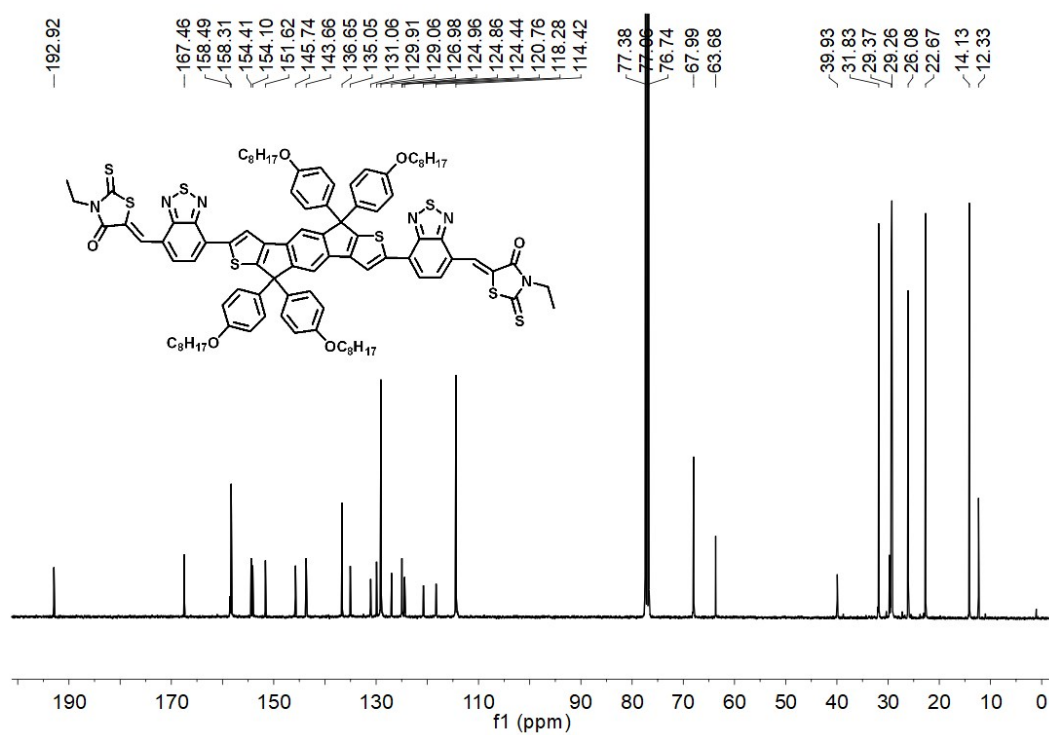

**Figure S10.** <sup>1</sup>H and <sup>13</sup>C NMR spectra of target compound a-IDTBTRh in CDCl<sub>3</sub>.
